# Supplementary material for: Epithelial-to-Mesenchymal Transition Rewires the Molecular Path to PI3K-Dependent Proliferation
Source: Oxford University Press journal article supplement (doi:10.1158/2159-8290.cd-13-0520), 2013-12-03
Supplement: 21598290cd130520-sup-supp_legends.pdf [file 21598290cd130520-sup-supp_legends.pdf]

**Supplemental material for**

**Epithelial to mesenchymal transition rewires the molecular path to PI3-Kinase-dependent proliferation**

Megan B. Salt<sup>1,2</sup>, Sourav Bandyopadhyay<sup>1,3</sup> and Frank McCormick<sup>1</sup>

Authors Affiliations: 1-Helen Diller Family Comprehensive Cancer Center; 2-Biomedical Sciences Graduate Program, University of California San Francisco, San Francisco, California; 3-California Institute for Quantitative Biosciences, San Francisco, California.

## Supplemental Figure Legends

**Table S1. EMT associated changes in gene expression.** Significantly (A) up- and (B) down-regulated genes in comparing H358-TwistER cells to control H358-GFP expressing cells treated with 100nM 4OHT for 12 days. The four columns on the right are associated with significantly upregulated genes, while the four columns furthest left described significantly downregulated genes. The first column for the up- and downregulated genes shows the Probe ID associated with each gene from the Affymetric Human Gene 1.0 ST microarrays. The gene name are shown in the next column, followed by the  $\log_2(\text{fold change})$  in expression for each gene after 4OHT treatment in the H358-TwistER cells. The final column shows the p-value for each gene adjusted for the false discovery rate.

**Figure S1. Akt inhibition reduces serum-independent proliferation.** (A) Proliferation of H358-TwistER cells with increasing concentrations ( $\mu\text{M}$ ) of GSK-690693 (top) or MK-2206 (bottom). (B) Lysates from H358-TwistER cells treated for 48hrs in serum free media with indicated concentrations of GSK-690693 (top), or MK-2206 (bottom).

**Figure S2. The effects of TGF $\beta$ 1 are specific to epithelial cells and lead to reduced serum-independent proliferation.** (A) Proliferation of untreated (top) or TGF $\beta$ 1 pre-treated (bottom) H358 and H441 cells in the presence (10%) or absence (SS) of serum. (B) Lysates from indicated cell lines treated with 2ng/ml TGF $\beta$ 1 for 14d.

**Figure S3. siRNAs targeting ErbB3 and NRG1 are efficient and on target and knockdown of autocrine TGF $\alpha$ /EREG does not affect ErbB3-PI3K signaling.** (A) Knockdown efficiencies at the protein level of indicated oligos 72hrs post-transfection. (B) Fold change in RNA level 48hrs post-transfection with indicated oligos. (C) Proliferation of H35-TwistER cells transfected with the indicated

siNRG1 oligos in the absence (-) or presence (+) of exogenous NRG1 ligand (100ng/ml). (D) Lysates from H358-TwistER cells (NT) collected 72hrs after transfection with indicated siRNA oligos, serum starved overnight. (E) qPCR quantification of fold change RNA level 72hrs post-transfection with indicated siRNAs. (F) Immunoprecipitation of ErbB3 and p85 from H358-TwistER lysates 72hrs after transfection with indicated oligos, serum starved overnight.

**Figure S4. Proliferation of epithelial cells after knockdown of TGF $\alpha$ /EGFR and ErbB3 in serum and in mesenchymal cells after EGFR expression in H358-TwistER cells.** (A) Proliferation of H358-TwistER cells in the presence of indicated siRNA oligos and serum conditions. (B) Proliferation of H358-TwistER cells before EMT in the presence of 10% serum after transfection with indicated siRNAs. (C) Proliferation of H358-TwistER cells after 14d 4OHT pre-treatment, after transfection with indicated expression constructs.

**Figure S5. ErbB3 and NRG1 promote Akt activity in H441 and H2122 cells and ErbB3 knockdown reduces serum-independent proliferation.** (A) Lysates from H441 and H2122 cell lines collected 72hrs after transfection with indicated siRNAs, serum starved overnight. (B) Immunoprecipitation of p85 from H441 and H2122 lysates 72hrs after transfection with NRG1 targeting siRNA, serum starved overnight. (C) Proliferation of H441 and H2122 cells in the absence of serum after transfection with indicated siRNAs. SS: serum starved; IP: Immunoprecipitation; WCL: whole cell lysates.

**Figure S6. GAB1 mediates growth factor stimulated signaling from EGFR to PI3K-Akt, and is required for proliferation in H358-TwistER cells after EMT.** (A) Lysates from H358-GFP expressing control cells 72hrs after transfection with indicated siRNAs, serum starved overnight, and treated +/- EGF for 10 minutes. (B) H358-TwistER cells pre- (NT) and post- (4OHT) EMT 72 hrs after transfection with control of GAB1 targeting siRNAs. Lysates collected from cells asynchronously growing in serum,

or starved overnight and treated 10min +/- EGF as indicated. (C) Proliferation of H358-TwistER cells with and without 4OHT pre-treatment after transfection with indicated siRNAs in 10% serum.

**Figure S7. KRas is required for proliferation before and after the induction of EMT.** Proliferation of H358-TwistER cells (A) before and (B) after 4OHT induced EMT in the presence of indicated siRNAs. (C) Lysates from H358-TwistER cells 72hrs after transfection with indicated siRNAs, serum starved overnight. (D) Relative cell numbers of H358-TwistER with and without 4OHT pre-treatment after 72 hours growth in the presence of indicated doses of PD0325901( $\mu$ M).

**Figure S8. EMT alters sensitivity to inhibition of EGFR but does not affect sensitivity to PI3K inhibitors.** (A) Relative cell number of H358-TwistER with and without 4OHT pre-treatment after 72 hours growth in the presence of indicated doses of Erlotinib (top) or BKM-120 (bottom). (B) Relative number of H441 cells with and without 2 weeks TGF $\beta$ 1 pre-treatment (2ng/ml) after 72 hours treatment with Erlotinib (top) or BKM-120 (bottom). (C) Relative number of H358 and H441 cells after transfection with ErbB3 siRNAs followed by treatment the next day with indicated doses of Erlotinib for 72 hours. Sensitivity to Erlotinib and Lapatinib compared to EMT Score (see methods) across all cell lines in the CCLE (D) and NSCLC lines (E). Sensitivity to GDC-0941 across NSCLC cell lines (F). Drug sensitivities are based on AUC from dose-responses analysis in the Cancer Cell Line Encyclopedia, with AUC<1 (area under the curve) used to define drug sensitive lines. \*\*\* indicates  $p < 0.0001$ , n.s.=not significant.

## Supplemental Methods

### Gene expression analysis

RNA was extracted from three biological replicates of each condition using Qiagen RNeasy mini kit according to manufacturer's instructions. Quality was analyzed on a 2100 BioAnalyzer (Agilent). GeneChip Human Gene 1.0 ST Arrays (Affymetrix) were used to quantitate gene expression in each sample. RNA preparation and data collection was performed at the Gladstone Institute Genomics Core Facility. Additional data analysis was performed by the Bioinformatics Core at the Helen Diller Family Comprehensive Cancer Center. Raw data and results can be found in the GEO database, accession number GSE52308.

### Phospho-Receptor Tyrosine Kinase Arrays

Phospho-RTK arrays were purchased from R&D Systems. Equal quantities of protein lysates from cells with and without 4OHT pre-treatment, were collected in supplied lysis buffer supplemented with protease inhibitor cocktail (Roche) and incubated on membranes and analyzed according to manufacturer's protocol.

### siRNA oligonucleotides

The following siRNA oligonucleotides were used for this study.

| siRNA Name | Company   | Catalogue Number | Target Sequence                 |
|------------|-----------|------------------|---------------------------------|
| Control    | Qiagen    | 1027281          | Proprietary                     |
| ErbB3 pool | Dharmacon | M-003127-03-0005 | See below (pool of 08/22/23/24) |
| ErbB3 08   | Dharmacon | D-003127-08      | GCAGUGGAUUCGAGAAGUG             |
| ErbB3 22   | Dharmacon | D-003127-22      | AGAUUGUGCUCACGGGACA             |
| ErbB3 23   | Dharmacon | D-003127-23      | GUGGAUUCGAGAAGUGACA             |

|                   |           |                  |                                                                                                |
|-------------------|-----------|------------------|------------------------------------------------------------------------------------------------|
| ErbB3 24          | Dharmacon | D-003127-24      | GCGAUGCUGAGAACCAAUA                                                                            |
| NRG1 pool         | Dharmacon | M-004608-02-0005 | See below (pool of 21/22/23/24)                                                                |
| NRG1 21           | Dharmacon | D-004608-21      | UUUCAAAACCCUCGAGAUUA                                                                           |
| NRG1 22           | Dharmacon | D-004608-22      | GGGGAGUGCUUCAUGGUGA                                                                            |
| NRG1 23           | Dharmacon | D-004608-23      | UUGUAAAAUGUGCGGAGAA                                                                            |
| NRG1 24           | Dharmacon | D-004608-24      | ACAUCCACCACUGGGACAA                                                                            |
| TGF $\alpha$ pool | Dharmacon | M-019737-01-0005 | Pool: CAGCAGUGGUGUCCCAUUU<br>GCAUGUGUCUGCCAUUCUG<br>GUACGUUGGUGCACGCUGU<br>ACUGCUGCCAGGUCCGAAA |
| Ereg pool         | Dharmacon | M-011268-01-0005 | Pool: GCUCUGACAUGAAUGGCUA<br>GUACAACUGUGAUUCCAUC<br>GAAGUGGGUUAUACUGGUG<br>GCUUUGACCGUGAUUCUUA |
| GAB1 pool         | Dharmacon | M-003553-00-0005 | Pool: AUACUUAGAUCUCGACUUA<br>CAUCAAAGCUAGACACUAU<br>GAUGCUGGAUUGACAUUUA<br>GAGAGUGGAUUAUGUUGUU |
| ErbB2 14          | Qiagen    | S102223571       | AACAAAGAAATCTTAGACGAA                                                                          |
| ErbB2 15          | Qiagen    | S102223578       | CACGTTTGAGTCCATGCCCAA                                                                          |
| EGFR 10           | Qiagen    | S102660140       | TACGAATATTAACACTTCAA                                                                           |
| EGFR 12           | Qiagen    | S102663983       | CAGGAACTGGATATTCTGAAA                                                                          |
| KRas 234          | Mirimus   | N/A              | Proprietary                                                                                    |
| KRas 355          | Mirimus   | N/A              | Proprietary                                                                                    |

## SYBR Green qPCR

RNA was isolated from cells using the RNEasy Mini kit (Qiagen). cDNA was synthesized from total RNA using SuperScript First-Strand Synthesis System for RT-PCR (Invitrogen). 10ng cDNA template was used in qPCR reaction along with 1X SYBR green master mix (Applied Biosystems), 0.2uM indicated forward and 0.2uM reverse primers. Data was collected on the Stratagene Mx 3000P machine and analyzed using  $\Delta(\Delta Ct)$  method to calculate fold change. Primers sequences are shown below.

The following qPCR primers were used for this study.

| Primers Targets      | Sequence                  |
|----------------------|---------------------------|
| ErbB3 forward        | GGTGATGGGGAACCTTGAGAT     |
| ErbB3 reverse        | CTGTCACTTCTCGAATCCACTG    |
| NRG1 forward         | GCCAGGAATCGGCTGCAGGT      |
| NRG1 reverse         | AGCCAGTGATGCTTTGTTAATGCGA |
| EGFR forward         | AGGCACGAGTAACAAGCTCAC     |
| EGFR reverse         | ATGAGGACATAACCAGCCACC     |
| EREG forward         | ATACTGGTGTCCGATGTGAACA    |
| EREG reverse         | CCGACGACTGTGATAAGAAACA    |
| TGF $\alpha$ forward | AGGTCCGAAAACACTGTGAGT     |
| TGF $\alpha$ reverse | AGCAAGCGGTTCTTCCCTTC      |

**Table S1. Up- and downregulated genes after EMT in H358-TwistER cells.**

| Upregulated Genes |          |         |           | Downregulated Genes |         |          |           |
|-------------------|----------|---------|-----------|---------------------|---------|----------|-----------|
| Probe Id          | Gene     | logFC   | adj.P.Val | Probe Id            | Gene    | logFC    | adj.P.Val |
| 8175531           | CDR1     | 4.63463 | 1.75E-05  | 7996837             | CDH1    | -4.88313 | 4.18E-06  |
| 8151768           | RUNX1T1  | 4.31314 | 1.43E-06  | 8138466             | MACC1   | -4.43717 | 1.43E-06  |
| 8113709           | LOX      | 3.84381 | 1.71E-06  | 8147697             | GRHL2   | -4.3459  | 3.88E-06  |
| 8056222           | DPP4     | 3.76184 | 1.43E-06  | 8138381             | AGR2    | -4.25826 | 2.59E-05  |
| 7937772           | IGF2     | 3.72641 | 1.71E-06  | 8041853             | EPCAM   | -4.10976 | 1.51E-06  |
| 8127563           | COL12A1  | 3.71022 | 1.71E-06  | 8147351             | RBM35A  | -4.04475 | 2.84E-06  |
| 8172022           | TMEM47   | 3.59735 | 9.59E-06  | 7906079             | RAB25   | -3.8594  | 7.30E-05  |
| 7922976           | PTGS2    | 3.52396 | 1.71E-06  | 8091515             | GPR87   | -3.76871 | 1.71E-06  |
| 8171248           | KAL1     | 3.51931 | 1.71E-06  | 7901175             | TSPAN1  | -3.68392 | 7.65E-05  |
| 8045688           | TNFAIP6  | 3.3745  | 4.18E-06  | 8099467             | FGFBP1  | -3.45693 | 3.92E-05  |
| 8169115           | NRK      | 3.32632 | 1.71E-06  | 8148040             | MAL2    | -3.40043 | 6.88E-06  |
| 8012906           | NA       | 3.12006 | 0.001827  | 7988876             | MYO5C   | -3.33204 | 3.88E-06  |
| 8012896           | PMP22    | 3.05346 | 0.000149  | 7934898             | ANKRD22 | -3.17542 | 1.10E-05  |
| 8139207           | INHBA    | 3.01441 | 3.88E-06  | 8015349             | KRT19   | -3.07426 | 9.59E-06  |
| 8163908           | GGTA1    | 2.92608 | 2.78E-05  | 8056184             | ITGB6   | -3.04222 | 2.84E-06  |
| 8111772           | DAB2     | 2.86815 | 4.18E-06  | 7953291             | CD9     | -3.03772 | 1.10E-05  |
| 8081036           | CADM2    | 2.85393 | 9.59E-06  | 8038683             | KLK6    | -2.96906 | 0.000383  |
| 7908204           | HMCN1    | 2.8232  | 1.41E-05  | 8095728             | EREG    | -2.93825 | 4.18E-06  |
| 8148070           | COL14A1  | 2.74084 | 1.57E-05  | 7980828             | CCDC88C | -2.91812 | 0.000172  |
| 8102587           | C4orf31  | 2.70024 | 5.34E-06  | 8126820             | GPR110  | -2.8445  | 3.16E-06  |
| 8092839           | LRRC15   | 2.6855  | 2.14E-05  | 7980891             | TC2N    | -2.71335 | 2.78E-05  |
| 8110932           | SEMA5A   | 2.6215  | 9.26E-06  | 8022711             | DSC2    | -2.65946 | 5.34E-06  |
| 8136200           | CPA4     | 2.57226 | 8.67E-05  | 7951686             | IL18    | -2.61783 | 0.000139  |
| 7939056           | BBOX1    | 2.5505  | 2.85E-05  | 7983157             | TMEM62  | -2.54362 | 9.59E-06  |
| 8077499           | LOH3CR2A | 2.52392 | 2.59E-05  | 8099850             | TMEM156 | -2.45245 | 0.000119  |
| 8145669           | RBPM5    | 2.48779 | 9.59E-06  | 8096602             | DAPP1   | -2.38953 | 3.45E-05  |
| 8046922           | COL3A1   | 2.42752 | 2.15E-05  | 8091799             | C3orf57 | -2.35357 | 7.12E-06  |
| 8059279           | EPHA4    | 2.41061 | 1.10E-05  | 8054479             | MALL    | -2.35077 | 9.59E-06  |
| 8160260           | BNC2     | 2.40748 | 1.78E-05  | 7908072             | LAMC2   | -2.32671 | 0.000624  |
| 8135734           | C7orf58  | 2.3846  | 9.59E-06  | 7901765             | HOOK1   | -2.31318 | 4.52E-05  |
| 8103244           | RNF175   | 2.3825  | 4.83E-05  | 8034084             | AP1M2   | -2.30972 | 0.004149  |
| 8168678           | FAM133A  | 2.35913 | 0.000635  | 7952046             | MPZL2   | -2.26365 | 2.15E-05  |
| 7939184           | TCP11L1  | 2.29015 | 4.14E-05  | 7996081             | GPR56   | -2.24638 | 0.000145  |
| 8113278           | LIX1     | 2.26841 | 6.06E-05  | 8028311             | SPINT2  | -2.23516 | 0.000223  |
| 7902495           | NEXN     | 2.23709 | 3.20E-05  | 7963421             | KRT6A   | -2.21261 | 0.000236  |
| 7988467           | FBN1     | 2.21824 | 7.65E-05  | 8084766             | TP63    | -2.20458 | 0.000222  |
| 8089544           | CCDC80   | 2.20817 | 9.59E-06  | 7961524             | ERP27   | -2.2026  | 3.25E-05  |



|         |           |         |          |  |         |          |          |          |
|---------|-----------|---------|----------|--|---------|----------|----------|----------|
| 8009073 | NA        | 2.18011 | 0.001209 |  | 7961182 | KLRC2    | -2.19814 | 0.00373  |
| 8161964 | FRMD3     | 2.16029 | 0.000101 |  | 7960529 | SCNN1A   | -2.16876 | 0.000136 |
| 8097628 | HHIP      | 2.15743 | 2.15E-05 |  | 8134351 | PPP1R9A  | -2.13242 | 2.04E-05 |
| 8057578 | CALCRL    | 2.15144 | 0.000134 |  | 7973067 | NP       | -2.1055  | 0.00051  |
| 8077490 | LMCD1     | 2.15143 | 4.21E-05 |  | 8078380 | ZNF860   | -2.09924 | 0.000604 |
| 8058765 | FN1       | 2.11916 | 0.000633 |  | 7981427 | CKB      | -2.08755 | 0.000324 |
| 8176234 | CLIC2     | 2.09084 | 0.001302 |  | 7920285 | S100A2   | -2.08706 | 2.29E-05 |
| 8008819 | YPEL2     | 2.08173 | 2.57E-05 |  | 8021301 | RAB27B   | -2.05519 | 2.44E-05 |
| 8040103 | ID2       | 2.07668 | 2.78E-05 |  | 8096130 | CDS1     | -2.02287 | 9.54E-05 |
| 8089112 | FILIP1L   | 2.0756  | 4.21E-05 |  | 8058708 | ABCA12   | -2.01918 | 0.000103 |
| 8101260 | ANTXR2    | 2.06234 | 2.29E-05 |  | 7939314 | EHF      | -1.97204 | 0.001052 |
| 8073015 | KDELR3    | 2.05824 | 0.000155 |  | 8131550 | SCIN     | -1.95194 | 7.65E-05 |
| 8089464 | LOC151760 | 2.05093 | 2.57E-05 |  | 8059350 | AP1S3    | -1.93254 | 0.001833 |
| 7971015 | SMAD9     | 2.02881 | 0.000213 |  | 8051583 | CYP1B1   | -1.87405 | 7.88E-05 |
| 8033744 | OR7E19P   | 2.02699 | 0.002679 |  | 8134030 | STEAP1   | -1.87038 | 0.001371 |
| 8111915 | SEPP1     | 2.02485 | 0.000589 |  | 8056408 | GALNT3   | -1.86435 | 0.000136 |
| 8092169 | TNFSF10   | 2.02382 | 0.00067  |  | 7918323 | SORT1    | -1.84935 | 5.71E-05 |
| 8081001 | ROBO2     | 1.99813 | 8.10E-05 |  | 8020551 | LAMA3    | -1.83503 | 7.65E-05 |
| 8100541 | IGFBP7    | 1.99772 | 4.66E-05 |  | 8083978 | NAALADL2 | -1.81231 | 0.000932 |
| 8104901 | IL7R      | 1.9911  | 2.15E-05 |  | 8067955 | CXADR    | -1.78273 | 0.000164 |
| 7957570 | PLXNC1    | 1.95451 | 3.92E-05 |  | 8099967 | RBM47    | -1.78141 | 8.10E-05 |
| 7910680 | GPR137B   | 1.94739 | 7.65E-05 |  | 8096682 | FLJ20184 | -1.77976 | 0.001132 |
| 7999909 | GPRC5B    | 1.91599 | 3.20E-05 |  | 7916584 | TACSTD2  | -1.7703  | 0.000321 |
| 8100393 | KDR       | 1.9074  | 5.93E-05 |  | 7962197 | NA       | -1.75101 | 4.83E-05 |
| 8121916 | RSPO3     | 1.90395 | 4.40E-05 |  | 7954729 | FGD4     | -1.72726 | 0.000363 |
| 8115543 | EBF1      | 1.89742 | 4.23E-05 |  | 8041179 | CLIP4    | -1.70661 | 7.65E-05 |
| 8166243 | REPS2     | 1.86915 | 7.65E-05 |  | 8012126 | CLDN7    | -1.68891 | 6.60E-05 |
| 8089015 | PROS1     | 1.86587 | 0.000156 |  | 7939150 | PRRG4    | -1.68859 | 0.000201 |
| 8090193 | HEG1      | 1.85875 | 8.80E-05 |  | 8027748 | FXYD3    | -1.68724 | 0.00043  |
| 8094789 | LIMCH1    | 1.83663 | 6.30E-05 |  | 8099760 | ARAP2    | -1.67164 | 0.001466 |
| 7985317 | KIAA1199  | 1.83025 | 0.000323 |  | 8127854 | ME1      | -1.65731 | 0.000294 |
| 7917532 | GBP2      | 1.82337 | 0.00019  |  | 7965403 | LUM      | -1.65643 | 0.001043 |
| 8156060 | TLE4      | 1.821   | 0.000106 |  | 7954899 | CNTN1    | -1.64958 | 0.000232 |
| 8096704 | NPNT      | 1.82018 | 0.00029  |  | 8161945 | RASEF    | -1.64299 | 0.000663 |
| 7939173 | DEPDC7    | 1.81104 | 8.10E-05 |  | 8151475 | TPD52    | -1.63113 | 0.001257 |
| 8121749 | GJA1      | 1.80975 | 0.000316 |  | 7962212 | PKP2     | -1.62948 | 0.000213 |
| 7980680 | FOXN3     | 1.79487 | 0.000142 |  | 8103951 | ACSL1    | -1.62487 | 0.001262 |
| 7950307 | UCP2      | 1.78093 | 0.003198 |  | 8117630 | ZNF165   | -1.62002 | 0.000717 |
| 7917530 | NA        | 1.77461 | 0.002269 |  | 7964927 | TSPAN8   | -1.61856 | 0.000868 |
| 8162183 | LOC440173 | 1.77399 | 0.001344 |  | 8023267 | MYO5B    | -1.60747 | 0.000213 |
| 7918857 | TSPAN2    | 1.75818 | 0.000327 |  | 8088247 | ARHGEF3  | -1.59573 | 0.001664 |

|         |          |         |          |  |         |           |          |          |
|---------|----------|---------|----------|--|---------|-----------|----------|----------|
| 7951910 | BACE1    | 1.75799 | 0.000427 |  | 7933855 | RTKN2     | -1.58539 | 0.000428 |
| 8082965 | MRAS     | 1.72797 | 8.10E-05 |  | 7951246 | MMP8      | -1.57619 | 0.002642 |
| 8056890 | CHN1     | 1.72743 | 0.000176 |  | 8095986 | ANXA3     | -1.57454 | 0.000308 |
| 8081235 | COL8A1   | 1.72218 | 0.000751 |  | 8112274 | ELOVL7    | -1.5703  | 0.000964 |
| 8167815 | MAGED2   | 1.70193 | 0.000324 |  | 7988414 | GATM      | -1.57015 | 0.000201 |
| 8029006 | AXL      | 1.70191 | 0.000363 |  | 7956120 | ERBB3     | -1.56973 | 0.001538 |
| 8073775 | FBLN1    | 1.69529 | 0.000324 |  | 8116780 | DSP       | -1.55659 | 0.000345 |
| 8102792 | PCDH18   | 1.6933  | 0.000142 |  | 7954065 | GPRC5A    | -1.55468 | 0.003137 |
| 8021685 | CCDC102B | 1.69173 | 0.002038 |  | 7979524 | TMEM30B   | -1.53967 | 0.000779 |
| 8149877 | PNMA2    | 1.68643 | 0.000142 |  | 8097801 | FAM160A1  | -1.53936 | 0.00225  |
| 7951077 | SESN3    | 1.68364 | 9.16E-05 |  | 7944164 | TMPRSS4   | -1.53885 | 0.00242  |
| 8017850 | WIP1     | 1.62783 | 0.000816 |  | 8098177 | KLHL2     | -1.52628 | 0.00015  |
| 8157582 | GSN      | 1.61354 | 0.000259 |  | 7957351 | C12orf64  | -1.52175 | 0.00231  |
| 8171624 | GPR64    | 1.59595 | 0.000689 |  | 8155707 | TJP2      | -1.50907 | 0.000594 |
| 8097903 | TLR2     | 1.59085 | 0.000364 |  | 8100026 | ATP8A1    | -1.50147 | 0.000221 |
| 8003667 | SERPINF1 | 1.58775 | 0.000447 |  | 8121152 | FUT9      | -1.49428 | 0.001245 |
| 8102938 | RNF150   | 1.57735 | 0.001371 |  | 7952036 | MPZL3     | -1.49391 | 0.000176 |
| 8143188 | CREB3L2  | 1.57361 | 0.000348 |  | 8133360 | CLDN4     | -1.48928 | 0.001118 |
| 8115327 | SPARC    | 1.56993 | 0.000223 |  | 8146500 | LYN       | -1.48085 | 0.000497 |
| 8155169 | RECK     | 1.56784 | 0.001447 |  | 7924029 | LAMB3     | -1.47776 | 0.004332 |
| 8104663 | CDH6     | 1.56602 | 0.000136 |  | 7986446 | ALDH1A3   | -1.45003 | 0.000387 |
| 8147469 | PGCP     | 1.54561 | 0.000572 |  | 8157300 | BSPRY     | -1.44589 | 0.000378 |
| 8129254 | MAN1A1   | 1.52491 | 0.000136 |  | 7920642 | MUC1      | -1.43903 | 0.000425 |
| 8043995 | IL1R1    | 1.52392 | 0.000176 |  | 8147661 | SPAG1     | -1.43271 | 0.000608 |
| 7913655 | ID3      | 1.51966 | 0.001371 |  | 8120783 | MYO6      | -1.42748 | 0.000221 |
| 8099721 | KIAA0746 | 1.51613 | 0.000156 |  | 8092095 | TNIK      | -1.42269 | 0.000348 |
| 7922268 | KIFAP3   | 1.5159  | 0.000232 |  | 8160151 | ZDHHC21   | -1.41346 | 0.006296 |
| 8141016 | TFPI2    | 1.50683 | 0.000322 |  | 8096116 | AGPAT9    | -1.41305 | 0.000321 |
| 8148059 | DEPDC6   | 1.50682 | 0.004706 |  | 7905406 | CGN       | -1.41107 | 0.000279 |
| 8097657 | SMAD1    | 1.50566 | 0.000164 |  | 8129783 | MAP7      | -1.40628 | 0.000635 |
| 8147461 | SDC2     | 1.50216 | 0.000117 |  | 8023855 | CYB5A     | -1.40583 | 0.001517 |
| 8169541 | DOCK11   | 1.50098 | 0.000327 |  | 8092541 | LIPH      | -1.40161 | 0.000478 |
| 8131844 | GPNMB    | 1.50076 | 0.000166 |  | 7967993 | FGF9      | -1.39218 | 0.000443 |
| 7964722 | WIF1     | 1.50061 | 0.000333 |  | 8120833 | SH3BGRL2  | -1.36707 | 0.000555 |
| 8172043 | SRPX     | 1.4968  | 0.003964 |  | 7947147 | SVIP      | -1.36397 | 0.00373  |
| 8142100 | ATXN7L1  | 1.48984 | 0.000497 |  | 7954711 | C12orf35  | -1.35975 | 0.001073 |
| 7971150 | LHFP     | 1.48298 | 0.000322 |  | 8078397 | CMTM8     | -1.35456 | 0.002532 |
| 8155734 | C9orf61  | 1.48132 | 0.000267 |  | 8149762 | TNFRSF10A | -1.33827 | 0.007364 |
| 8146967 | CRISPLD1 | 1.46536 | 0.000232 |  | 7970441 | GJB2      | -1.31357 | 0.000605 |
| 8102482 | SEC24D   | 1.46302 | 0.00023  |  | 7923958 | C1orf116  | -1.29486 | 0.003253 |
| 8127051 | TRAM2    | 1.45591 | 0.00329  |  | 8152812 | FAM84B    | -1.28948 | 0.000816 |

|         |           |         |          |  |         |              |          |          |
|---------|-----------|---------|----------|--|---------|--------------|----------|----------|
| 7944554 | TMEM136   | 1.45451 | 0.000417 |  | 8089467 | ZBED2        | -1.28568 | 0.000438 |
| 8156261 | NA        | 1.45206 | 0.000387 |  | 8021584 | SERPINB5     | -1.27755 | 0.000649 |
| 8111387 | ADAMTS12  | 1.44322 | 0.001876 |  | 8138613 | OSBPL3       | -1.27698 | 0.000323 |
| 8069676 | ADAMTS1   | 1.44061 | 0.000213 |  | 8044605 | LOC654433    | -1.27593 | 0.00269  |
| 8094609 | FAM114A1  | 1.4394  | 0.000609 |  | 8098379 | WDR17        | -1.27123 | 0.004084 |
| 7933821 | RHOBTB1   | 1.43929 | 0.000348 |  | 8015412 | JUP          | -1.26472 | 0.007251 |
| 8078286 | RARB      | 1.43556 | 0.000947 |  | 7899407 | SMPDL3B      | -1.25767 | 0.001809 |
| 8147065 | RALYL     | 1.43411 | 0.000635 |  | 8046238 | MYO3B        | -1.25406 | 0.001943 |
| 8059376 | SERPINE2  | 1.43183 | 0.000514 |  | 8105267 | ITGA2        | -1.24645 | 0.001481 |
| 8109333 | GPX3      | 1.43099 | 0.00045  |  | 8166469 | SAT1         | -1.24615 | 0.00491  |
| 8059565 | PID1      | 1.42579 | 0.000232 |  | 7965040 | PHLDA1       | -1.23195 | 0.000348 |
| 8174119 | ZMAT1     | 1.42304 | 0.000556 |  | 8124331 | HIST1H2AA    | -1.23147 | 0.001401 |
| 7944970 | NA        | 1.42111 | 0.000213 |  | 8098006 | GLRB         | -1.21753 | 0.00301  |
| 8075142 | TTC28     | 1.4139  | 0.000232 |  | 8109001 | SPINK5       | -1.21411 | 0.001371 |
| 8175217 | GPC4      | 1.41386 | 0.000458 |  | 8127193 | BMP5         | -1.20729 | 0.001458 |
| 7927631 | DKK1      | 1.41375 | 0.000208 |  | 8016994 | RNF43        | -1.20483 | 0.000581 |
| 8164580 | PTGES     | 1.41343 | 0.000319 |  | 8058498 | FZD5         | -1.2007  | 0.001183 |
| 8041447 | CRIM1     | 1.4118  | 0.003383 |  | 8122336 | C6orf115     | -1.20057 | 0.004798 |
| 8155192 | GLIPR2    | 1.41144 | 0.000417 |  | 8091600 | PLCH1        | -1.19919 | 0.001576 |
| 8127094 | GSTA4     | 1.41    | 0.001102 |  | 8076757 | CELSR1       | -1.19829 | 0.005372 |
| 8063382 | SNAI1     | 1.40651 | 0.000323 |  | 8124166 | MBOAT1       | -1.19797 | 0.000546 |
| 7950810 | SYTL2     | 1.40493 | 0.000453 |  | 8155883 | OSTF1        | -1.19135 | 0.000549 |
| 8014316 | CCL5      | 1.39992 | 0.001724 |  | 7942118 | MYEOV        | -1.18531 | 0.0038   |
| 8056877 | CHRNA1    | 1.39685 | 0.000463 |  | 7932765 | MPP7         | -1.18453 | 0.000673 |
| 8009040 | MRC2      | 1.39013 | 0.000464 |  | 8171725 | MAP7D2       | -1.18196 | 0.000853 |
| 8107563 | PRR16     | 1.38798 | 0.000285 |  | 7936439 | AFAP1L2      | -1.17717 | 0.004875 |
| 8094936 | LOC280665 | 1.38494 | 0.001051 |  | 8149534 | ASAH1        | -1.17704 | 0.000498 |
| 8055624 | ZEB2      | 1.38448 | 0.000308 |  | 8159992 | ERMP1        | -1.1681  | 0.002179 |
| 8162533 | PTCH1     | 1.3741  | 0.000573 |  | 7970954 | DCLK1        | -1.16502 | 0.009259 |
| 8115234 | ANXA6     | 1.35551 | 0.000438 |  | 8121768 | PKIB         | -1.15902 | 0.004486 |
| 8091306 | PLSCR4    | 1.3496  | 0.000278 |  | 7902290 | CTH          | -1.15736 | 0.001189 |
| 8107133 | PAM       | 1.34818 | 0.000402 |  | 8129071 | FRK          | -1.15298 | 0.000628 |
| 7990632 | SGK269    | 1.34352 | 0.000826 |  | 8169949 | RP6-213H19.1 | -1.14286 | 0.001118 |
| 7943369 | TMEM133   | 1.34115 | 0.002506 |  | 8043522 | PROM2        | -1.14074 | 0.003374 |
| 8096032 | PRDM8     | 1.33958 | 0.000511 |  | 8015016 | TNS4         | -1.13561 | 0.006065 |
| 8102678 | TRPC3     | 1.33746 | 0.000581 |  | 8095819 | FAM47E       | -1.13236 | 0.001741 |
| 8053379 | LOC129293 | 1.33552 | 0.000853 |  | 8047078 | MFSD6        | -1.13145 | 0.001044 |
| 8067985 | NCAM2     | 1.33463 | 0.000853 |  | 8096301 | SPP1         | -1.12712 | 0.002238 |
| 7908161 | C1orf21   | 1.33181 | 0.000816 |  | 8018082 | SLC39A11     | -1.1264  | 0.002494 |
| 7925531 | AKT3      | 1.33021 | 0.000478 |  | 8021453 | SEC11C       | -1.12397 | 0.001431 |
| 8029950 | EHD2      | 1.32914 | 0.000418 |  | 7978544 | EGLN3        | -1.11868 | 0.001022 |

|         |            |         |          |  |         |           |          |          |
|---------|------------|---------|----------|--|---------|-----------|----------|----------|
| 8118890 | SCUBE3     | 1.32501 | 0.001651 |  | 7991562 | NA        | -1.11345 | 0.009588 |
| 8112731 | F2RL2      | 1.32282 | 0.000232 |  | 7899265 | SFN       | -1.10568 | 0.003404 |
| 8059345 | SCG2       | 1.32192 | 0.002373 |  | 8150138 | TEX15     | -1.10486 | 0.004649 |
| 8097288 | FAT4       | 1.31515 | 0.000361 |  | 8127158 | GCLC      | -1.09756 | 0.000852 |
| 8108370 | EGR1       | 1.31059 | 0.000511 |  | 8052872 | TGFA      | -1.09733 | 0.002641 |
| 7983527 | SEMA6D     | 1.30855 | 0.003989 |  | 7983512 | SQRDL     | -1.09134 | 0.008589 |
| 8057599 | TFPI       | 1.30842 | 0.001848 |  | 7902850 | GBP6      | -1.08633 | 0.002415 |
| 8072735 | APOL1      | 1.3051  | 0.001302 |  | 8122756 | PLEKHG1   | -1.08585 | 0.003787 |
| 8053484 | ST3GAL5    | 1.29375 | 0.000635 |  | 8166202 | GRPR      | -1.08406 | 0.003057 |
| 7908388 | RGS1       | 1.29184 | 0.000438 |  | 8166747 | SYTL5     | -1.0787  | 0.00178  |
| 8129497 | EPB41L2    | 1.28276 | 0.000816 |  | 8009685 | SLC9A3R1  | -1.07055 | 0.002931 |
| 7961514 | MGP        | 1.28009 | 0.00225  |  | 7957608 | KRT19P2   | -1.06837 | 0.004141 |
| 8101126 | CXCL10     | 1.27564 | 0.001952 |  | 7901272 | CYP4X1    | -1.06681 | 0.00136  |
| 7961083 | CLEC2B     | 1.27411 | 0.000556 |  | 8139021 | KIAA0895  | -1.06089 | 0.003725 |
| 8062312 | MYL9       | 1.27312 | 0.00045  |  | 7993588 | TMC7      | -1.05966 | 0.001833 |
| 8158250 | CERCAM     | 1.27236 | 0.004017 |  | 7930139 | TRIM8     | -1.05469 | 0.001647 |
| 7988563 | SHC4       | 1.26397 | 0.000418 |  | 8083146 | PLS1      | -1.0514  | 0.002833 |
| 8169235 | FRMPD3     | 1.25486 | 0.002439 |  | 7917954 | FRRS1     | -1.05138 | 0.000836 |
| 8023575 | CCBE1      | 1.25422 | 0.001996 |  | 8080013 | MAPKAPK3  | -1.04848 | 0.003546 |
| 8052654 | PELI1      | 1.25257 | 0.000816 |  | 8042211 | B3GNT2    | -1.04132 | 0.008448 |
| 8105061 | NA         | 1.24114 | 0.00211  |  | 8047854 | CCNYL1    | -1.04039 | 0.00927  |
| 8057898 | HECW2      | 1.23724 | 0.000324 |  | 8107005 | CAST      | -1.03637 | 0.000836 |
| 8060854 | PLCB1      | 1.23533 | 0.000364 |  | 7915787 | PIK3R3    | -1.03627 | 0.000947 |
| 8095868 | UNQ3028    | 1.23416 | 0.002276 |  | 8123884 | C6orf52   | -1.03043 | 0.005276 |
| 7952249 | USP2       | 1.22729 | 0.001    |  | 8116835 | GCNT2     | -1.01971 | 0.001012 |
| 7942697 | CAPN5      | 1.2271  | 0.000474 |  | 8117301 | HIST1H2BA | -1.01583 | 0.005881 |
| 7902425 | ST6GALNAC3 | 1.22367 | 0.000428 |  | 8130505 | EZR       | -1.01533 | 0.002234 |
| 8174228 | TCEAL8     | 1.21915 | 0.000635 |  | 8127534 | C6orf150  | -1.01254 | 0.004721 |
| 8088602 | MAGI1      | 1.21855 | 0.001821 |  | 8121015 | C6orf165  | -1.01122 | 0.005858 |
| 7964602 | LRIG3      | 1.21453 | 0.000417 |  | 7993638 | TMC5      | -1.00889 | 0.003536 |
| 7943319 | CNTN5      | 1.21453 | 0.000497 |  | 8090091 | PTPLB     | -1.00885 | 0.001546 |
| 7971905 | PCDH20     | 1.21319 | 0.000924 |  | 8091411 | TM4SF1    | -1.00411 | 0.001875 |
| 8091243 | PCOLCE2    | 1.21303 | 0.000345 |  | 7921882 | OLFML2B   | -1.00366 | 0.002924 |
| 7928944 | PAPSS2     | 1.21285 | 0.000749 |  | 8041961 | CHAC2     | -1.00331 | 0.007659 |
| 8147000 | ZFHX4      | 1.21165 | 0.000816 |  | 7989146 | MNS1      | -1.00035 | 0.005    |
| 7934906 | ACTA2      | 1.21039 | 0.001741 |  | 8082673 | ACPP      | -0.99581 | 0.002323 |
| 7975932 | TMEM63C    | 1.21014 | 0.002438 |  | 8084206 | B3GNT5    | -0.99555 | 0.002256 |
| 8057677 | SLC40A1    | 1.20934 | 0.000678 |  | 7990054 | UACA      | -0.99395 | 0.001081 |
| 8175263 | PLAC1      | 1.20837 | 0.000333 |  | 8021546 | ZCCHC2    | -0.9937  | 0.005958 |
| 8048026 | CPS1       | 1.2057  | 0.001102 |  | 8163116 | EPB41L4B  | -0.99168 | 0.002296 |
| 7903162 | TMEM56     | 1.20468 | 0.002231 |  | 7918157 | VAV3      | -0.99045 | 0.001741 |

|         |              |         |          |  |         |           |          |          |
|---------|--------------|---------|----------|--|---------|-----------|----------|----------|
| 7926545 | PLXDC2       | 1.20425 | 0.000974 |  | 8032392 | MKNK2     | -0.98972 | 0.002494 |
| 7985016 | SNX33        | 1.2038  | 0.003706 |  | 8174005 | TRMT2B    | -0.98913 | 0.002158 |
| 8069541 | SAMSN1       | 1.20326 | 0.003282 |  | 8022728 | DSC1      | -0.98622 | 0.00229  |
| 8105220 | ISL1         | 1.20249 | 0.000428 |  | 7980265 | ACYP1     | -0.98552 | 0.008724 |
| 7906954 | PBX1         | 1.19781 | 0.001876 |  | 7944722 | UBASH3B   | -0.98095 | 0.006306 |
| 8157802 | NA           | 1.19416 | 0.000752 |  | 7957417 | TMTC2     | -0.98023 | 0.002593 |
| 7965979 | ALDH1L2      | 1.19354 | 0.000671 |  | 8166956 | UTX       | -0.97976 | 0.006114 |
| 8046333 | CYBRD1       | 1.1933  | 0.000572 |  | 8102311 | CASP6     | -0.97709 | 0.003847 |
| 8015635 | PTRF         | 1.19276 | 0.001458 |  | 8112998 | LOC645261 | -0.97335 | 0.0094   |
| 8123678 | C6orf145     | 1.19271 | 0.005114 |  | 8098041 | TMEM144   | -0.9683  | 0.00884  |
| 7908125 | RGL1         | 1.19264 | 0.004024 |  | 8166511 | PDK3      | -0.96778 | 0.00175  |
| 8095080 | PDGFRA       | 1.18988 | 0.001191 |  | 7908351 | PLA2G4A   | -0.96552 | 0.007432 |
| 7988426 | SLC30A4      | 1.18988 | 0.002227 |  | 8147516 | MATN2     | -0.96448 | 0.00599  |
| 8012464 | LOC100128288 | 1.1887  | 0.004048 |  | 7938890 | PRMT3     | -0.9633  | 0.005446 |
| 8126760 | RCAN2        | 1.18515 | 0.001555 |  | 8122202 | MYB       | -0.96207 | 0.009232 |
| 7974214 | KLHDC1       | 1.18504 | 0.001191 |  | 7932453 | NEBL      | -0.95649 | 0.002113 |
| 8103389 | CTSO         | 1.17778 | 0.001083 |  | 7941505 | CST6      | -0.95476 | 0.005958 |
| 8091715 | LXN          | 1.17517 | 0.003374 |  | 7965964 | SLC41A2   | -0.95457 | 0.002164 |
| 8175666 | GABRE        | 1.17413 | 0.000635 |  | 8065344 | FOXA2     | -0.948   | 0.005659 |
| 7937335 | IFITM1       | 1.17334 | 0.00137  |  | 8027642 | PDCD2L    | -0.94591 | 0.00339  |
| 8161701 | TMEM2        | 1.1711  | 0.001103 |  | 8081171 | CRYBG3    | -0.93749 | 0.006359 |
| 7987439 | GPR176       | 1.1707  | 0.000939 |  | 8044919 | RALB      | -0.93627 | 0.005163 |
| 8080964 | GLT8D4       | 1.16994 | 0.001087 |  | 7965390 |           | -0.93507 | 0.00373  |
| 7943349 | FLJ32810     | 1.16846 | 0.001    |  | 7962579 | AMIGO2    | -0.93278 | 0.002038 |
| 8081838 | CDGAP        | 1.16699 | 0.00138  |  | 8060949 | ANKRD5    | -0.92867 | 0.00288  |
| 8151890 | TP53INP1     | 1.16341 | 0.0019   |  | 7983890 | GCOM1     | -0.92464 | 0.005446 |
| 7933750 | SLC16A9      | 1.16018 | 0.000521 |  | 8113691 | DTWD2     | -0.92004 | 0.006036 |
| 8105121 | GHR          | 1.15777 | 0.000831 |  | 7961983 | TM7SF3    | -0.91577 | 0.00175  |
| 8041206 | LBH          | 1.15713 | 0.000816 |  | 8063410 | PARD6B    | -0.91006 | 0.00373  |
| 7930454 | PDCD4        | 1.15627 | 0.000939 |  | 7909285 | PFKFB2    | -0.90402 | 0.002865 |
| 8081081 | EPHA3        | 1.15405 | 0.005955 |  | 8123562 | GMDS      | -0.89985 | 0.002055 |
| 7917052 | SLC44A5      | 1.14978 | 0.002146 |  | 7943293 | ENDOD1    | -0.8997  | 0.001933 |
| 8108724 | PCDHB10      | 1.14872 | 0.000954 |  | 8094778 | UCHL1     | -0.8978  | 0.005626 |
| 7910387 | RHOA         | 1.14779 | 0.000816 |  | 8122807 | AKAP12    | -0.89682 | 0.002854 |
| 7989073 | PRTG         | 1.14648 | 0.001478 |  | 8135514 | IFRD1     | -0.89304 | 0.008532 |
| 8099797 | RELL1        | 1.14307 | 0.003423 |  | 7951545 | EXPH5     | -0.88884 | 0.002555 |
| 8138834 | FKBP14       | 1.1423  | 0.009792 |  | 8107673 | GRAMD3    | -0.88865 | 0.002979 |
| 8056343 | COBLL1       | 1.14132 | 0.005685 |  | 8150076 | DUSP4     | -0.88838 | 0.003312 |
| 8106516 | JMY          | 1.13957 | 0.002852 |  | 8092726 | CLDN1     | -0.88343 | 0.002077 |
| 8098204 | CPE          | 1.13475 | 0.000635 |  | 7950391 | PGM2L1    | -0.88021 | 0.005955 |
| 7951133 | MAML2        | 1.13281 | 0.00081  |  | 8001830 | CMTM4     | -0.87822 | 0.004094 |

|         |          |         |          |  |         |           |          |          |
|---------|----------|---------|----------|--|---------|-----------|----------|----------|
| 8128284 | EPHA7    | 1.1296  | 0.002077 |  | 7961151 | KLRK1     | -0.87556 | 0.008173 |
| 8129562 | CTGF     | 1.12798 | 0.000605 |  | 8068633 | B3GALT5   | -0.87538 | 0.002931 |
| 7980316 | TGFB3    | 1.12606 | 0.000675 |  | 7899087 | PDIK1L    | -0.87454 | 0.003057 |
| 8097867 | KIAA0922 | 1.12528 | 0.000942 |  | 8017150 | TUBD1     | -0.87072 | 0.009306 |
| 7905428 | TUFT1    | 1.12504 | 0.006347 |  | 8069998 | C21orf59  | -0.87016 | 0.003134 |
| 8136347 | CALD1    | 1.12496 | 0.001052 |  | 8162652 | CTSL2     | -0.86731 | 0.003721 |
| 8105411 | IL31RA   | 1.11713 | 0.001073 |  | 7958174 | TXNRD1    | -0.86463 | 0.008757 |
| 8146115 | C8orf4   | 1.11683 | 0.002184 |  | 8067233 | PMEP A1   | -0.86213 | 0.008321 |
| 7902541 | IFI44L   | 1.11669 | 0.002641 |  | 8106784 | RASA1     | -0.86143 | 0.003721 |
| 8103544 | SPOCK3   | 1.1138  | 0.005685 |  | 8008547 | TOM1L1    | -0.86088 | 0.002077 |
| 7912887 | MFAP2    | 1.11312 | 0.001073 |  | 8138857 | GGCT      | -0.86077 | 0.004898 |
| 8151532 | FABP4    | 1.11064 | 0.004888 |  | 7901804 | INADL     | -0.85906 | 0.003536 |
| 8099982 | APBB2    | 1.10929 | 0.006608 |  | 7969171 | DLEU1     | -0.85794 | 0.006982 |
| 8103789 | GPM6A    | 1.10631 | 0.004017 |  | 8028563 | MRPS12    | -0.85353 | 0.004706 |
| 8095303 | LPHN3    | 1.10561 | 0.000725 |  | 8079153 | ABHD5     | -0.85244 | 0.004132 |
| 8133961 | RUNDC3B  | 1.10166 | 0.001371 |  | 7909214 | RASSF5    | -0.84785 | 0.00337  |
| 8102532 | PDE5A    | 1.10128 | 0.001044 |  | 8050160 | MBOAT2    | -0.84767 | 0.006798 |
| 7926916 | ZEB1     | 1.1007  | 0.002307 |  | 8152845 | FAM49B    | -0.84055 | 0.007251 |
| 8084219 | KLHL24   | 1.09901 | 0.001292 |  | 8081431 | ALCAM     | -0.83717 | 0.002924 |
| 7951565 | ARHGAP20 | 1.09101 | 0.00096  |  | 7919326 | ACP6      | -0.83651 | 0.005678 |
| 8117045 | RBM24    | 1.09095 | 0.001419 |  | 8043902 | PDCL3     | -0.83457 | 0.00591  |
| 7906919 | RGS4     | 1.09081 | 0.003312 |  | 8141107 | SLC25A13  | -0.82825 | 0.005774 |
| 7984704 | NEO1     | 1.08425 | 0.001262 |  | 8171392 | ASB9      | -0.82308 | 0.007251 |
| 8112107 | PPAP2A   | 1.08285 | 0.000754 |  | 8089329 | MYH15     | -0.82299 | 0.003546 |
| 8020495 | CABLES1  | 1.08179 | 0.002555 |  | 8103106 | LRBA      | -0.82117 | 0.003202 |
| 7902565 | LPHN2    | 1.08099 | 0.000568 |  | 8049542 | LRRFIP1   | -0.81947 | 0.003384 |
| 8174092 | ARMCX2   | 1.08006 | 0.001367 |  | 7920057 | TDRKH     | -0.81722 | 0.006965 |
| 8112971 | HAPLN1   | 1.07828 | 0.001431 |  | 8171901 | MAP3K7IP3 | -0.81579 | 0.003987 |
| 7907213 | SCYL1BP1 | 1.07649 | 0.001908 |  | 7921434 | AIM2      | -0.81519 | 0.006065 |
| 7970999 | SPG20    | 1.07448 | 0.000893 |  | 8106193 | UTP15     | -0.8132  | 0.007326 |
| 7985248 | KIAA1024 | 1.07325 | 0.004852 |  | 7899534 | EPB41     | -0.81224 | 0.008072 |
| 7984019 | TLN2     | 1.07231 | 0.002055 |  | 8148270 | NDUFB9    | -0.80498 | 0.006591 |
| 8120613 | RIMS1    | 1.07106 | 0.001555 |  | 7943413 | BIRC3     | -0.80423 | 0.009463 |
| 7956856 | MSRB3    | 1.07073 | 0.006798 |  | 7898549 | MRTO4     | -0.80259 | 0.003919 |
| 7958346 | C12orf23 | 1.07036 | 0.001888 |  | 8107520 | TNFAIP8   | -0.79939 | 0.007687 |
| 8151223 | SLCO5A1  | 1.06632 | 0.002839 |  | 7934133 | PPA1      | -0.79707 | 0.008724 |
| 7930181 | AS3MT    | 1.06484 | 0.006432 |  | 7985134 | IDH3A     | -0.79683 | 0.004252 |
| 8106393 | F2R      | 1.06076 | 0.001052 |  | 8124527 | HIST1H1B  | -0.79646 | 0.005243 |
| 8142098 | ATXN7L1  | 1.06028 | 0.002184 |  | 8113577 | TRIM36    | -0.79571 | 0.005958 |
| 8091260 | SLC9A9   | 1.05963 | 0.002506 |  | 7957072 | RAB3IP    | -0.79465 | 0.005132 |
| 8098214 | TLL1     | 1.05681 | 0.001128 |  | 8048898 | SP140     | -0.79229 | 0.006253 |

|         |          |          |          |  |         |          |          |          |
|---------|----------|----------|----------|--|---------|----------|----------|----------|
| 7936322 | GPAM     | 1.04976  | 0.002037 |  | 8058670 | IKZF2    | -0.7889  | 0.00416  |
| 7934196 | PSAP     | 1.04904  | 0.002596 |  | 8171006 | BRCC3    | -0.78863 | 0.005973 |
| 7964119 | STAT2    | 1.04763  | 0.003186 |  | 8020468 | RBBP8    | -0.78714 | 0.00961  |
| 8085797 | THRB     | 1.04757  | 0.006287 |  | 8157233 | HSDL2    | -0.7867  | 0.008412 |
| 7915444 | LEPRE1   | 1.04739  | 0.00809  |  | 7958211 | C12orf45 | -0.78561 | 0.005276 |
| 8090690 | CPNE4    | 1.04589  | 0.007251 |  | 7986350 | ARRDC4   | -0.78304 | 0.008506 |
| 8139212 | GLI3     | 1.04171  | 0.003441 |  | 8097335 | HSPA4L   | -0.78041 | 0.004024 |
| 7934570 | KCNMA1   | 1.04147  | 0.00288  |  | 7978174 | CHMP4A   | -0.77822 | 0.006741 |
| 7971690 | NA       | 1.0382   | 0.007094 |  | 8164013 | STRBP    | -0.77291 | 0.004084 |
| 8021154 | KIAA0427 | 1.03071  | 0.001952 |  | 8157828 | ARPC5L   | -0.766   | 0.006798 |
| 7918426 | SLC16A4  | 1.03046  | 0.005586 |  | 8026047 | JUNB     | -0.76585 | 0.005685 |
| 7961120 | CLEC7A   | 1.02987  | 0.002837 |  | 8042066 | CCDC104  | -0.76458 | 0.009821 |
| 8123651 | TUBB2B   | 1.02412  | 0.00175  |  | 7989953 | FLJ11506 | -0.76441 | 0.008539 |
| 8078350 | TGFB2    | 1.02261  | 0.002234 |  | 8120335 | FAM83B   | -0.76344 | 0.007916 |
| 8027279 | ZNF430   | 1.02224  | 0.003546 |  | 8147344 | PPM2C    | -0.76254 | 0.005586 |
| 8027285 | ZNF714   | 1.02156  | 0.008721 |  | 8038993 | ZNF28    | -0.75767 | 0.008445 |
| 7917850 | ARHGAP29 | 1.01767  | 0.003546 |  | 8123407 | MLLT4    | -0.75509 | 0.007251 |
| 8101657 | NA       | 1.01764  | 0.008506 |  | 8132922 | MRPS17   | -0.75304 | 0.009161 |
| 8112803 | LHFPL2   | 1.01249  | 0.009089 |  | 8163402 | ROD1     | -0.742   | 0.006653 |
| 8056376 | SCN3A    | 1.00985  | 0.001805 |  | 8129974 | FUCA2    | -0.73957 | 0.00772  |
| 8173917 | NAP1L3   | 1.00849  | 0.002356 |  | 7963333 | KRT80    | -0.73639 | 0.005893 |
| 8169995 | FAM122C  | 1.0055   | 0.008757 |  | 8154151 | PPAPDC2  | -0.73408 | 0.007718 |
| 8096959 | ANK2     | 1.00537  | 0.002877 |  | 8103769 | HPGD     | -0.7228  | 0.00952  |
| 8007323 | CNTNAP1  | 1.00492  | 0.001103 |  | 8156321 | SYK      | -0.72133 | 0.007251 |
| 7997642 | CRISPLD2 | 1.00346  | 0.001681 |  | 8175052 | AIFM1    | -0.71904 | 0.009161 |
| 7947199 | LGR4     | 1.00104  | 0.004663 |  | 7949679 | SPTBN2   | -0.71118 | 0.009768 |
| 7907370 | DNM3     | 0.999599 | 0.003231 |  | 8021169 | LIPG     | -0.7075  | 0.007678 |
| 8113761 | ZNF608   | 0.998896 | 0.004072 |  | 8040655 | SELI     | -0.70351 | 0.008275 |
| 8047300 | AOX1     | 0.997046 | 0.00136  |  | 7934367 | ANXA7    | -0.69448 | 0.007261 |
| 8122365 | GPR126   | 0.996313 | 0.004084 |  | 8083630 | GFM1     | -0.693   | 0.007251 |
| 8089701 | ZBTB20   | 0.993347 | 0.003772 |  | 8064904 | FERMT1   | -0.68397 | 0.008643 |
| 8049471 | CXCR7    | 0.991584 | 0.007251 |  | 8049512 | LRRFIP1  | -0.67938 | 0.007433 |
| 8175574 | SLITRK4  | 0.987388 | 0.003086 |  |         |          |          |          |
| 8088634 | NA       | 0.984343 | 0.009161 |  |         |          |          |          |
| 8138647 | C7orf31  | 0.982396 | 0.002736 |  |         |          |          |          |
| 8168875 | ARMCX3   | 0.981238 | 0.00175  |  |         |          |          |          |
| 8135544 | FOXP2    | 0.980416 | 0.001741 |  |         |          |          |          |
| 8069269 | COL6A1   | 0.98007  | 0.001183 |  |         |          |          |          |
| 8152867 | ASAP1    | 0.977961 | 0.002249 |  |         |          |          |          |
| 8020141 | APCDD1   | 0.977538 | 0.002854 |  |         |          |          |          |
| 8161044 | TPM2     | 0.977299 | 0.001913 |  |         |          |          |          |

|         |          |          |          |  |  |  |  |  |
|---------|----------|----------|----------|--|--|--|--|--|
| 8104788 | RAI14    | 0.977231 | 0.001431 |  |  |  |  |  |
| 8018652 | RNF157   | 0.977058 | 0.00178  |  |  |  |  |  |
| 7978718 | SEC23A   | 0.975574 | 0.00175  |  |  |  |  |  |
| 8142554 | AASS     | 0.974237 | 0.001643 |  |  |  |  |  |
| 8142102 | ATXN7L1  | 0.971482 | 0.001952 |  |  |  |  |  |
| 8068238 | IFNAR2   | 0.971331 | 0.005695 |  |  |  |  |  |
| 8163257 | LPAR1    | 0.970155 | 0.001731 |  |  |  |  |  |
| 8113433 | EFNA5    | 0.9689   | 0.003374 |  |  |  |  |  |
| 7909529 | RCOR3    | 0.964976 | 0.001741 |  |  |  |  |  |
| 8142096 | ATXN7L1  | 0.962836 | 0.00178  |  |  |  |  |  |
| 7919669 | MTMR11   | 0.962711 | 0.001344 |  |  |  |  |  |
| 7946478 | DENND5A  | 0.96268  | 0.006682 |  |  |  |  |  |
| 8152355 | GOLSYN   | 0.962349 | 0.006729 |  |  |  |  |  |
| 8095854 | 11-Sep   | 0.958495 | 0.001654 |  |  |  |  |  |
| 8127109 | ICK      | 0.955404 | 0.001651 |  |  |  |  |  |
| 8175256 | MGC16121 | 0.953665 | 0.00339  |  |  |  |  |  |
| 8111220 | CDH18    | 0.951793 | 0.008006 |  |  |  |  |  |
| 7935188 | SORBS1   | 0.949925 | 0.002073 |  |  |  |  |  |
| 8046726 | SSFA2    | 0.949155 | 0.001245 |  |  |  |  |  |
| 7917151 | C1orf118 | 0.945583 | 0.003574 |  |  |  |  |  |
| 8091537 | IGSF10   | 0.944787 | 0.002637 |  |  |  |  |  |
| 8102200 | DKK2     | 0.942074 | 0.006874 |  |  |  |  |  |
| 8096160 | ARHGAP24 | 0.941734 | 0.003915 |  |  |  |  |  |
| 8068280 | IFNGR2   | 0.939175 | 0.001983 |  |  |  |  |  |
| 8047069 | INPP1    | 0.939074 | 0.00884  |  |  |  |  |  |
| 7983867 | CGNL1    | 0.936527 | 0.00491  |  |  |  |  |  |
| 7917347 | DDAH1    | 0.935062 | 0.002037 |  |  |  |  |  |
| 8012918 | CDRT4    | 0.934106 | 0.006762 |  |  |  |  |  |
| 7974425 | SAMD4A   | 0.933725 | 0.006216 |  |  |  |  |  |
| 8114263 | LECT2    | 0.929546 | 0.00491  |  |  |  |  |  |
| 8081758 | GRAMD1C  | 0.927725 | 0.006036 |  |  |  |  |  |
| 8176163 | GAB3     | 0.923358 | 0.004782 |  |  |  |  |  |
| 8023497 | ATP8B1   | 0.920158 | 0.006653 |  |  |  |  |  |
| 7924465 | HHIPL2   | 0.919412 | 0.002142 |  |  |  |  |  |
| 7924071 | KCNH1    | 0.918018 | 0.004706 |  |  |  |  |  |
| 8078605 | C3orf35  | 0.913386 | 0.002038 |  |  |  |  |  |
| 8000574 | NUPR1    | 0.91203  | 0.004084 |  |  |  |  |  |
| 8077899 | PPARG    | 0.906487 | 0.005808 |  |  |  |  |  |
| 7917503 | GBP3     | 0.905981 | 0.004803 |  |  |  |  |  |
| 8160138 | NFIB     | 0.905456 | 0.00301  |  |  |  |  |  |
| 8175647 | CD99L2   | 0.904239 | 0.004574 |  |  |  |  |  |



|         |            |          |          |  |  |  |  |  |
|---------|------------|----------|----------|--|--|--|--|--|
| 8164269 | ENG        | 0.902823 | 0.008589 |  |  |  |  |  |
| 8105436 | MAP3K1     | 0.90275  | 0.005163 |  |  |  |  |  |
| 8001800 | CDH11      | 0.900702 | 0.003805 |  |  |  |  |  |
| 7907222 | PRRX1      | 0.900522 | 0.007708 |  |  |  |  |  |
| 7957140 | LGR5       | 0.886672 | 0.006794 |  |  |  |  |  |
| 8167763 | TSPYL2     | 0.886622 | 0.004123 |  |  |  |  |  |
| 8154059 | SMARCA2    | 0.885715 | 0.002077 |  |  |  |  |  |
| 8170239 | NA         | 0.88566  | 0.009792 |  |  |  |  |  |
| 8133860 | GNAI1      | 0.885031 | 0.00558  |  |  |  |  |  |
| 8097449 | PCDH10     | 0.883696 | 0.002865 |  |  |  |  |  |
| 7957298 | NAV3       | 0.877755 | 0.006982 |  |  |  |  |  |
| 7984112 | RAB8B      | 0.876989 | 0.009161 |  |  |  |  |  |
| 7935968 | LDB1       | 0.875637 | 0.007463 |  |  |  |  |  |
| 8068713 | MX1        | 0.870726 | 0.00809  |  |  |  |  |  |
| 8156199 | DAPK1      | 0.868859 | 0.006296 |  |  |  |  |  |
| 8105077 | CARD6      | 0.863966 | 0.006448 |  |  |  |  |  |
| 8078330 | RBMS3      | 0.862431 | 0.006448 |  |  |  |  |  |
| 8078187 | PLCL2      | 0.861301 | 0.00954  |  |  |  |  |  |
| 8138277 | VWDE       | 0.857326 | 0.008004 |  |  |  |  |  |
| 7927732 | ARID5B     | 0.856913 | 0.005695 |  |  |  |  |  |
| 8061305 | NCRNA00153 | 0.849433 | 0.003551 |  |  |  |  |  |
| 8168984 | BHLHB9     | 0.848535 | 0.003538 |  |  |  |  |  |
| 8008289 | TMEM92     | 0.848279 | 0.003937 |  |  |  |  |  |
| 8058091 | SATB2      | 0.843138 | 0.005514 |  |  |  |  |  |
| 7922130 | DPT        | 0.842998 | 0.008006 |  |  |  |  |  |
| 8059413 | DOCK10     | 0.839158 | 0.002924 |  |  |  |  |  |
| 8081590 | PHLDB2     | 0.838696 | 0.002877 |  |  |  |  |  |
| 7954481 | SSPN       | 0.837577 | 0.006653 |  |  |  |  |  |
| 8107100 | RGMB       | 0.836798 | 0.006216 |  |  |  |  |  |
| 8167887 | MAGEH1     | 0.836627 | 0.005416 |  |  |  |  |  |
| 7961798 | SOX5       | 0.834989 | 0.008553 |  |  |  |  |  |
| 8155754 | MAMDC2     | 0.832763 | 0.008573 |  |  |  |  |  |
| 7902687 | CYR61      | 0.832359 | 0.006155 |  |  |  |  |  |
| 8089759 | TMEM39A    | 0.832296 | 0.003442 |  |  |  |  |  |
| 7947624 | PHF21A     | 0.831766 | 0.004866 |  |  |  |  |  |
| 7921088 | NES        | 0.831596 | 0.007061 |  |  |  |  |  |
| 8047538 | BMPR2      | 0.821181 | 0.007866 |  |  |  |  |  |
| 8023727 | DSEL       | 0.817354 | 0.008485 |  |  |  |  |  |
| 7899851 | ADC        | 0.816963 | 0.00461  |  |  |  |  |  |
| 7950248 | FCHSD2     | 0.814872 | 0.008178 |  |  |  |  |  |
| 7954077 | KIAA1467   | 0.813736 | 0.003237 |  |  |  |  |  |

|         |          |          |          |  |  |  |  |  |
|---------|----------|----------|----------|--|--|--|--|--|
| 8113214 | GLRX     | 0.80155  | 0.006036 |  |  |  |  |  |
| 7906400 | IFI16    | 0.80012  | 0.005964 |  |  |  |  |  |
| 8083471 | SGEF     | 0.799467 | 0.003714 |  |  |  |  |  |
| 8140739 | TP53TG1  | 0.793989 | 0.007379 |  |  |  |  |  |
| 8151056 | CYP7B1   | 0.791078 | 0.006982 |  |  |  |  |  |
| 8157524 | TLR4     | 0.79037  | 0.006798 |  |  |  |  |  |
| 7985285 | ARNT2    | 0.786287 | 0.003678 |  |  |  |  |  |
| 7990657 | TBC1D2B  | 0.784118 | 0.005626 |  |  |  |  |  |
| 7962895 | FKBP11   | 0.783285 | 0.006653 |  |  |  |  |  |
| 7927784 | MGC14425 | 0.782853 | 0.003772 |  |  |  |  |  |
| 7947165 | SLC5A12  | 0.782722 | 0.006359 |  |  |  |  |  |
| 8169240 | PRPS1    | 0.781517 | 0.004888 |  |  |  |  |  |
| 7946401 | ST5      | 0.778929 | 0.006741 |  |  |  |  |  |
| 8122600 | STXBP5   | 0.774656 | 0.009194 |  |  |  |  |  |
| 8080781 | PXK      | 0.774578 | 0.007806 |  |  |  |  |  |
| 8154100 | VLDLR    | 0.772864 | 0.008527 |  |  |  |  |  |
| 7913582 | ZNF436   | 0.765103 | 0.008178 |  |  |  |  |  |
| 8094911 | ATP10D   | 0.764741 | 0.007379 |  |  |  |  |  |
| 8070182 | RCAN1    | 0.76088  | 0.008209 |  |  |  |  |  |
| 7939434 | TTC17    | 0.760712 | 0.008004 |  |  |  |  |  |
| 8127234 | DST      | 0.753755 | 0.006653 |  |  |  |  |  |
| 7917912 | DPYD     | 0.747564 | 0.005493 |  |  |  |  |  |
| 8091402 | TM4SF18  | 0.746188 | 0.006359 |  |  |  |  |  |
| 8004571 | EFNB3    | 0.745742 | 0.005466 |  |  |  |  |  |
| 8015590 | STAT5B   | 0.745245 | 0.006347 |  |  |  |  |  |
| 8052689 | SPRED2   | 0.745092 | 0.007046 |  |  |  |  |  |
| 8175369 | MAP7D3   | 0.73884  | 0.006798 |  |  |  |  |  |
| 8147837 | ZFPM2    | 0.737449 | 0.009306 |  |  |  |  |  |
| 7954293 | PDE3A    | 0.735628 | 0.007031 |  |  |  |  |  |
| 8058477 | KLF7     | 0.733328 | 0.009161 |  |  |  |  |  |
| 7905754 | ATP8B2   | 0.732026 | 0.007251 |  |  |  |  |  |
| 8112649 | FAM169A  | 0.726654 | 0.006653 |  |  |  |  |  |
| 8108753 | PCDHB15  | 0.723274 | 0.009397 |  |  |  |  |  |
| 8140620 | PCLO     | 0.723    | 0.009287 |  |  |  |  |  |
| 8163892 | C9orf31  | 0.722064 | 0.006036 |  |  |  |  |  |
| 8129573 | MOXD1    | 0.721576 | 0.008553 |  |  |  |  |  |
| 7980616 | PTPN21   | 0.716431 | 0.008275 |  |  |  |  |  |
| 8101376 | SEC31A   | 0.71607  | 0.00809  |  |  |  |  |  |
| 7984771 | LOXL1    | 0.713133 | 0.008127 |  |  |  |  |  |
| 7947425 | CD59     | 0.708443 | 0.008559 |  |  |  |  |  |
| 7978407 | PRKD1    | 0.708069 | 0.006359 |  |  |  |  |  |

|         |           |          |          |  |  |  |  |  |
|---------|-----------|----------|----------|--|--|--|--|--|
| 7983132 | LOC645106 | 0.700161 | 0.009592 |  |  |  |  |  |
| 8154449 | CNTLN     | 0.693362 | 0.00964  |  |  |  |  |  |
| 8173428 | NA        | 0.684125 | 0.00811  |  |  |  |  |  |
| 8148553 | LY6K      | 0.679264 | 0.007605 |  |  |  |  |  |
