# Supplementary figures and images for: Epithelial-to-Mesenchymal Transition Rewires the Molecular Path to PI3K-Dependent Proliferation
Source: Oxford University Press journal article supplement (doi:10.1158/2159-8290.cd-13-0520), 2013-12-03

# Supplemental Figure 1

**A**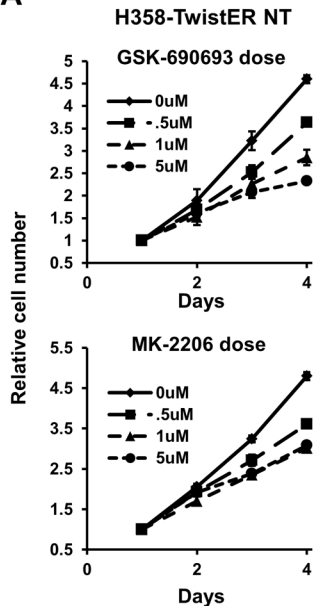**B**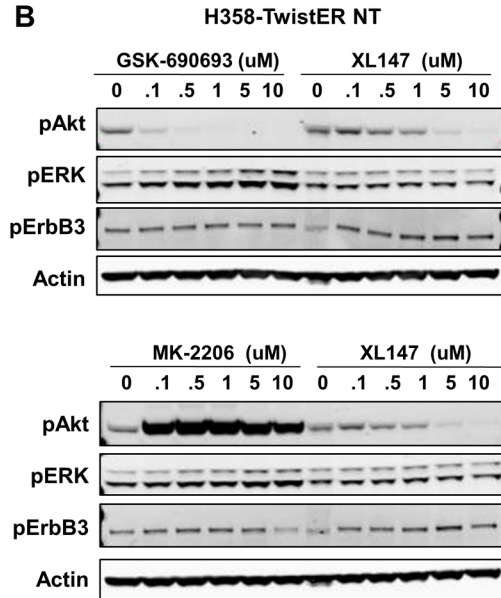

Supplement: 21598290cd130520-sup-fig_s1.pdf [file 21598290cd130520-sup-fig_s1.pdf]

# Supplemental Figure 2

## A

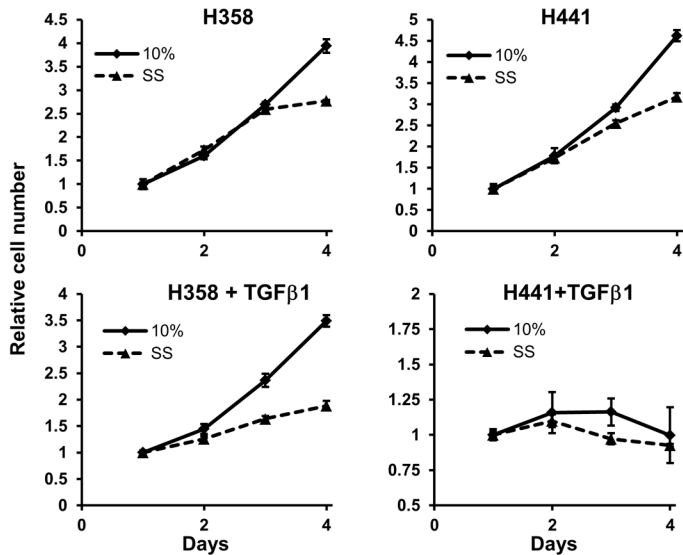

## B

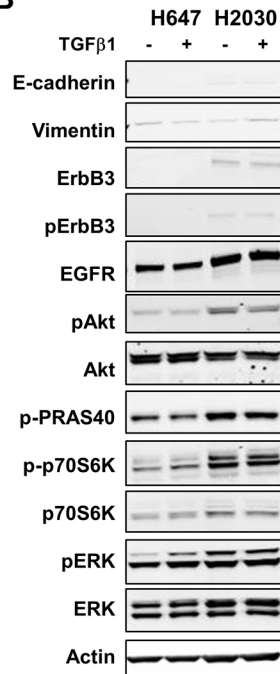

Supplement: 21598290cd130520-sup-fig_s2.pdf [file 21598290cd130520-sup-fig_s2.pdf]

# Supplemental Figure 3

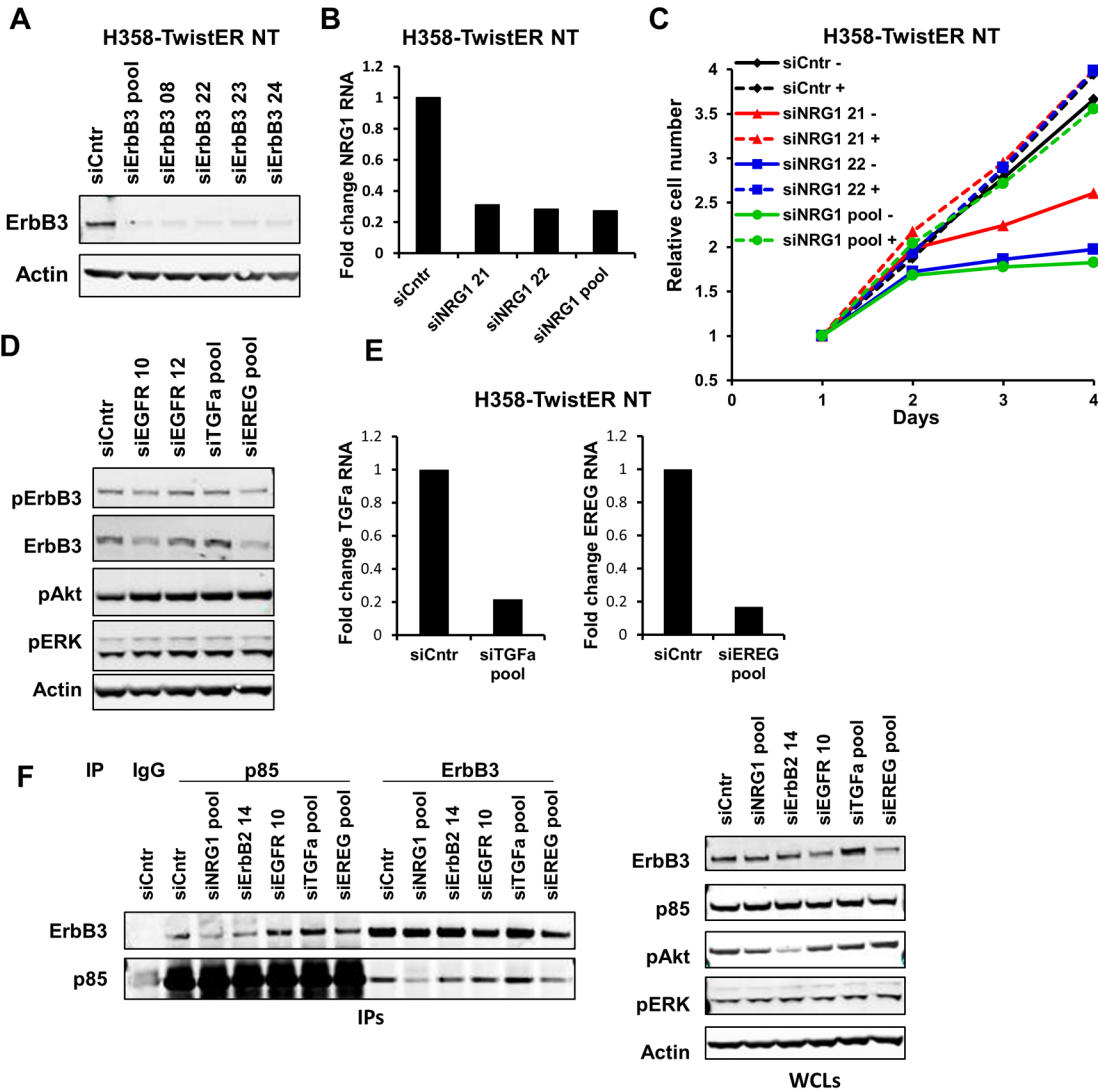

Supplement: 21598290cd130520-sup-fig_s3.pdf [file 21598290cd130520-sup-fig_s3.pdf]

# Supplemental Figure 4

**A**

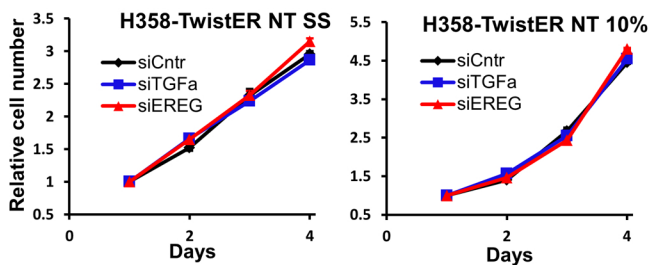

**B**

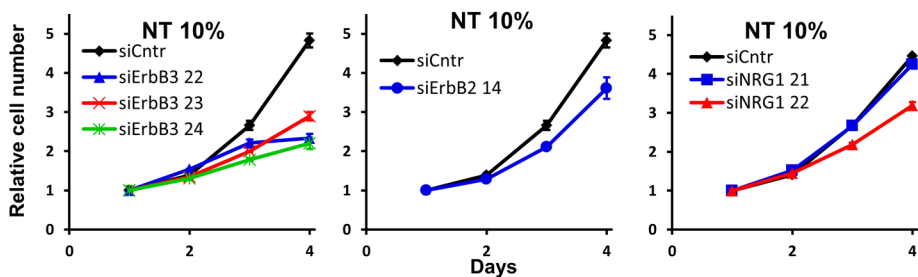

**C**

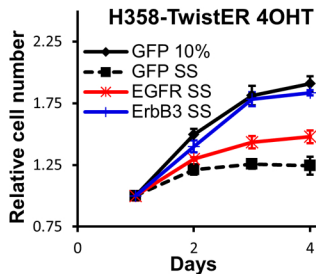

Supplement: 21598290cd130520-sup-fig_s4.pdf [file 21598290cd130520-sup-fig_s4.pdf]

# Supplemental Figure 5

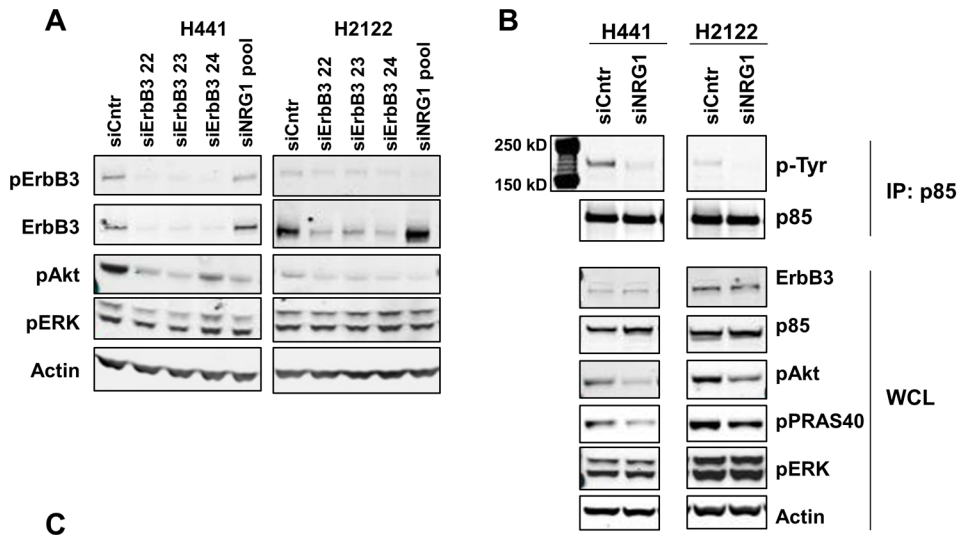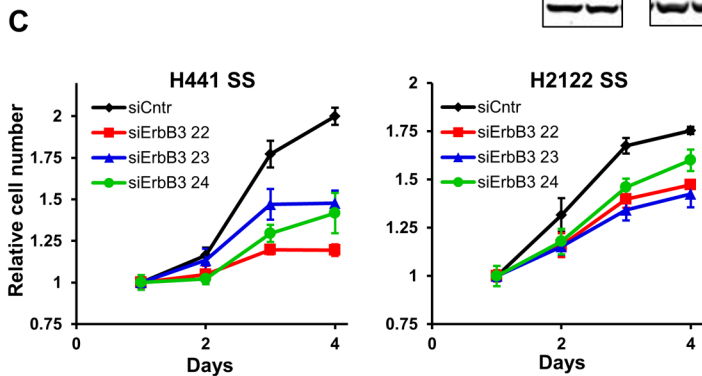

Supplement: 21598290cd130520-sup-fig_s5.pdf [file 21598290cd130520-sup-fig_s5.pdf]

# Supplemental Figure 6

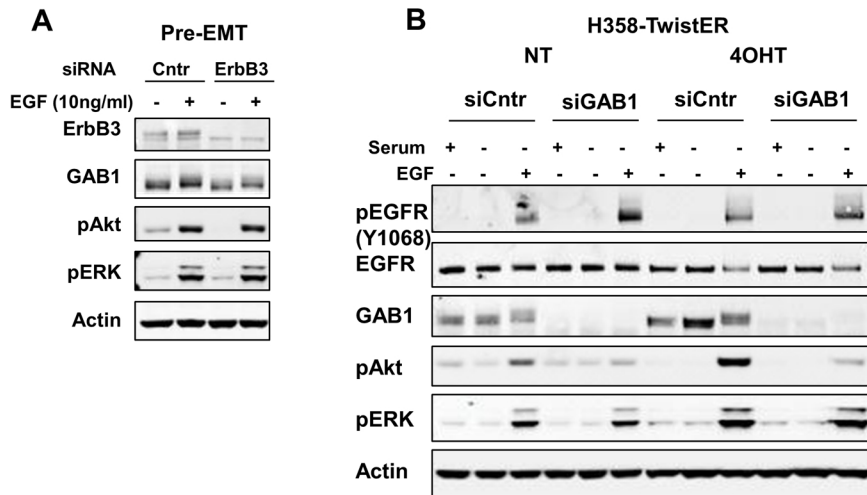

**C**

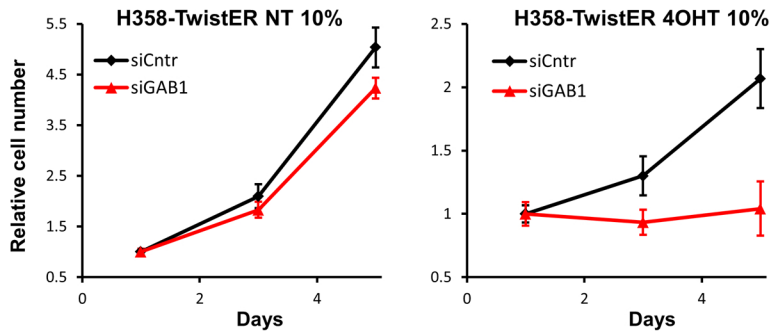

Supplement: 21598290cd130520-sup-fig_s6.pdf [file 21598290cd130520-sup-fig_s6.pdf]

# Supplemental Figure 7

**A**

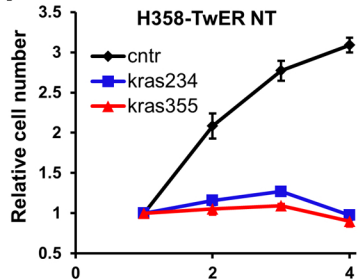

**B**

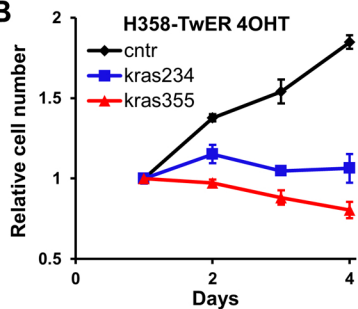

**C**

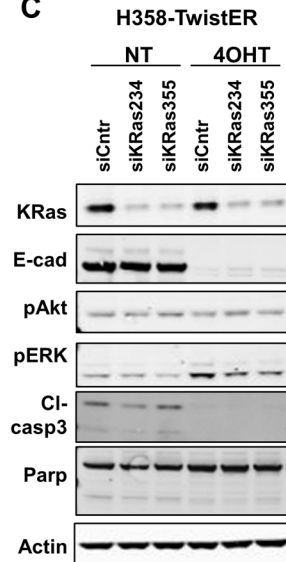

**D**

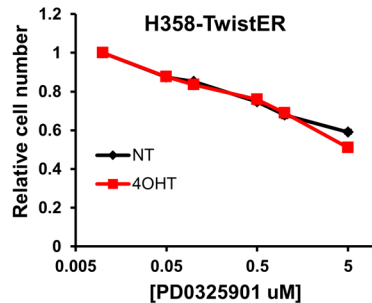

Supplement: 21598290cd130520-sup-fig_s7.pdf [file 21598290cd130520-sup-fig_s7.pdf]

# Supplemental Figure 8

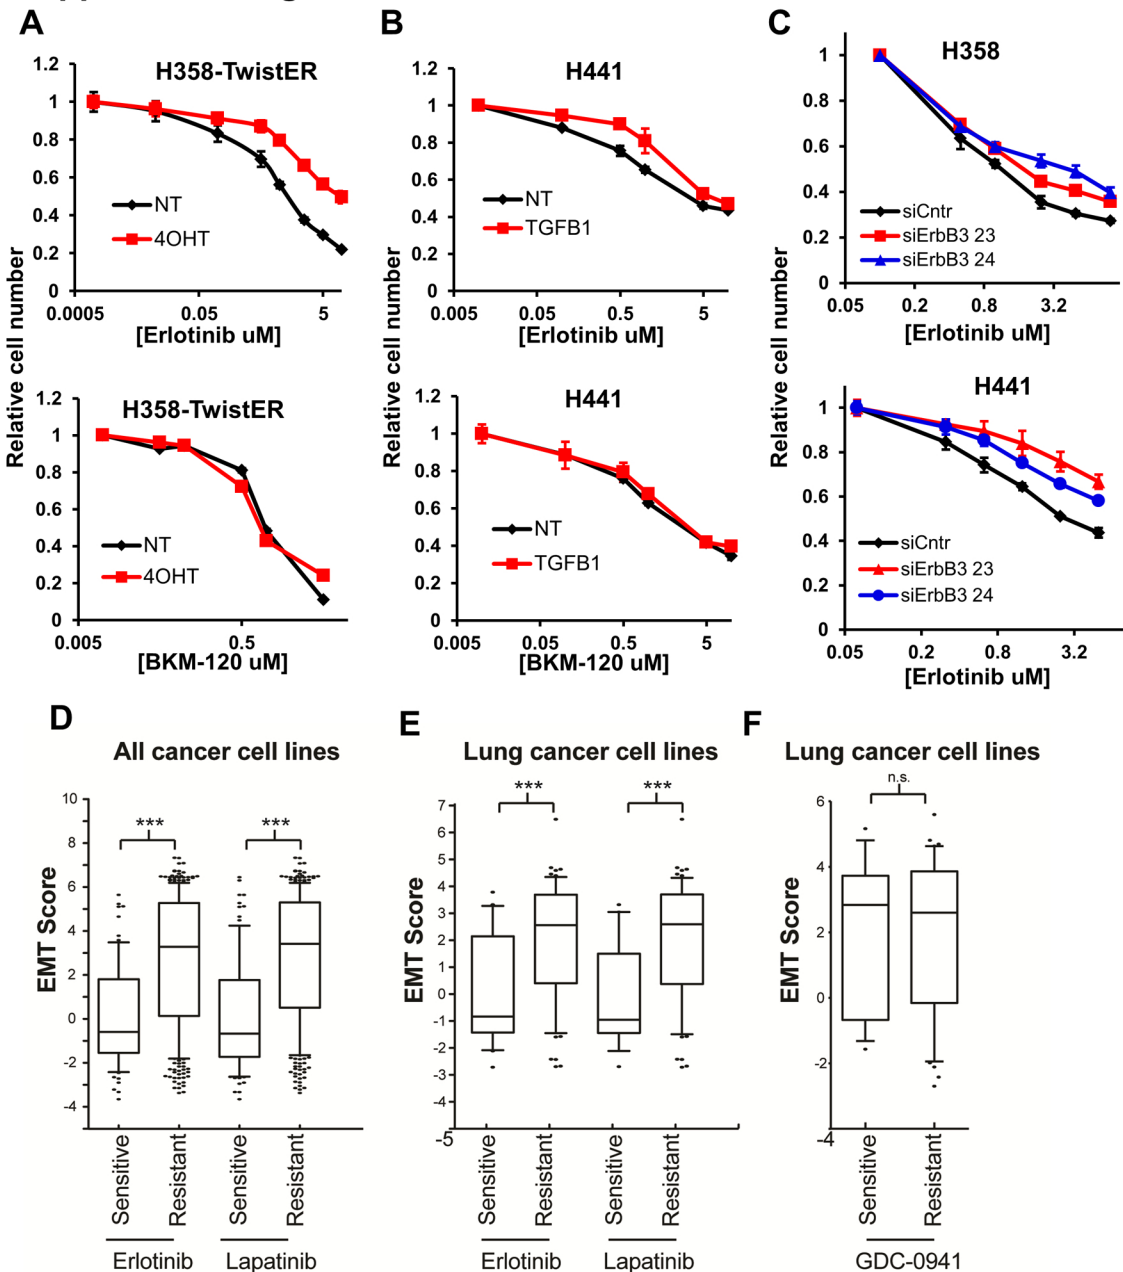

Supplement: 21598290cd130520-sup-fig_s8.pdf [file 21598290cd130520-sup-fig_s8.pdf]
